# Supplementary material for: SRSF3, a Splicer of the PKM Gene, Regulates Cell Growth and Maintenance of Cancer-Specific Energy Metabolism in Colon Cancer Cells
Source: MDPI journal article supplement (doi:10.3390/ijms19103012), 2018-10-02
Supplement: s1 [file s1]

1 **SRSF3, a splicer of the *PKM* gene, regulates to cell**  
2 **growth and maintenance of cancer-specific energy**  
3 **metabolism in colon cancer cells**

4 Yuki Kuranaga <sup>1</sup>, Nobuhiko Sugito <sup>1</sup>, Haruka Shinohara <sup>1</sup>, Takuya Tsujino <sup>2</sup>, Kohei Taniguchi <sup>3,4</sup>,  
5 Kazumasa Komura <sup>2,4</sup>, Yuko Ito <sup>5</sup>, Tomoyoshi Soga <sup>6</sup> and Yukihiro Akao <sup>1,\*</sup>

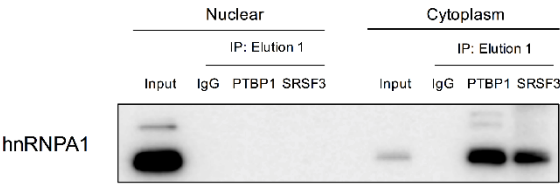

6  
7 **Supplementary Figure 1.** Western blot of hnRNPA1 from the immunoprecipitated samples. The  
8 detail is shown in Materials and Methods section.
